# Supplementary material for: An MRM-Based Multiplexed Quantification Assay for Human Adipokines and Apolipoproteins
Source: PubMed Central journal article supplement (PMC7070386; doi:10.3390/molecules25040775), 2020-02-11
Supplement: molecules-25-00775-s001.pdf [file molecules-25-00775-s001.pdf]

## Supplement

**Table S1.** MS transitions and MRM parameters for proteolytic tryptic peptides of 16 adipokines and 10 apolipoproteins and corresponding stable isotope-labeled peptides used as standard (S). For each biomarker the final candidate peptide amino acid sequence and *m/z* is displayed. Furthermore, the transitions used for quantification and identification (fragment ions) and optimized declustering potential (DP) and collision energy (CE) are listed for each peptide. The same information is provided for the isotope-labeled peptide standards.

| Protein            | Proteolytic peptide  | <i>m/z</i> | Quantifier                   |            | Qualifier 1 and 2                                           |                 | DP / V                | CE / V             |
|--------------------|----------------------|------------|------------------------------|------------|-------------------------------------------------------------|-----------------|-----------------------|--------------------|
|                    |                      |            | Fragment ion                 | <i>m/z</i> | Fragment ion                                                | <i>m/z</i>      |                       |                    |
| <b>Adiponectin</b> | GDIGETGVPGAEGPR      | 706.34     | y <sub>7</sub>               | 683.35     | y <sub>9</sub> / b <sub>8</sub>                             | 839.44 / 729.34 | 125 / 106.3 / 125     | 34 / 34.3 / 27     |
| <b>Adipsin</b>     | LYDVLR               | 389.73     | y <sub>5</sub>               | 665.36     | y <sub>4</sub> / b <sub>4</sub>                             | 502.30 / 246.13 | 73                    | 16.9               |
| <b>Asprosin</b>    | EGISYLHFTK           | 398.88     | y <sub>7</sub> <sup>+2</sup> | 448.24     | y <sub>5</sub> <sup>+2</sup> / y <sub>6</sub> <sup>+2</sup> | 323.19 / 404.72 | 66.3 / 45.3 / 67.0    | 15.7 / 15.0 / 14.7 |
| <b>Chemerin</b>    | GLQVALEEFHK          | 424.23     | b <sub>2</sub>               | 171.11     | y <sub>2</sub> <sup>+2</sup> / y <sub>9</sub> <sup>+2</sup> | 142.59 / 553.80 | 67.0 / 59.7 / 51.0    | 17.0 / 20.7 / 14.3 |
| <b>DLK-1</b>       | LPSGYGLAYR           | 548.79     | y <sub>9</sub> <sup>+2</sup> | 492.25     | y <sub>5</sub> / y <sub>8</sub>                             | 579.32 / 886.44 | 118.0 / 89.3 / 78.7   | 26.3 / 31.7 / 30.7 |
| <b>GLP-1</b>       | HAEGTFTSDVSSYLEGQAAK | 700.00     | y <sub>7</sub>               | 716.40     | y <sub>6</sub> / y <sub>10</sub>                            | 603.31 /        | 73                    | 29.7 / 26.7 / 29.7 |
| <b>IL-6</b>        | EALAENLNLPK          | 663.36     | y <sub>2</sub>               | 244.17     | y <sub>8</sub> / y <sub>9</sub>                             | 941.51 /        | 114.0 / 79.7 / 127    | 30.7 / 31.0 / 30.3 |
| <b>IL-10</b>       | DQLDNLLLK            | 536.31     | y <sub>7</sub>               | 828.52     | y <sub>5</sub> / y <sub>6</sub>                             | 600.41 / 715.43 | 100.7 / 95.7 / 70.7   | 23.0 / 28.3 / 23.0 |
| <b>Leptin</b>      | DLLHVLAFSK           | 381.56     | y <sub>8</sub> <sup>+2</sup> | 457.78     | y <sub>4</sub> / y <sub>7</sub> <sup>+2</sup>               | 452.25 / 401.23 | 61.3 / 62.7 / 70.0    | 13.3 / 15.3 / 18.3 |
| <b>PAI-1</b>       | FIINDWVK             | 517.79     | y <sub>6</sub>               | 774.41     | y <sub>5</sub> / b <sub>2</sub>                             | 661.33 / 261.16 | 112.0 / 104.0 / 98.3  | 21.0 / 22.7 / 20.7 |
| <b>Progranulin</b> | GSEIVAGLEK           | 501.78     | y <sub>7</sub>               | 729.45     | y <sub>5</sub> / y <sub>6</sub>                             | 517.30 / 616.37 | 95.0 / 49.3 / 48.3    | 22.3 / 21.3 / 23   |
| <b>RBP-4</b>       | YWGVASFLQK           | 599.82     | y <sub>6</sub>               | 693.39     | y <sub>8</sub> / b <sub>2</sub>                             | 849.48 / 350.15 | 83.0 / 79.0 / 91      | 26.3 / 27.0 / 27.0 |
| <b>Resistin</b>    | IQEVAGSLIFR          | 616.85     | y <sub>7</sub>               | 763.45     | y <sub>6</sub> / y <sub>9</sub>                             | 692.41 / 991.56 | 106.3 / 96.7 / 112.30 | 30.7 / 29.7 / 28.3 |
| <b>TNFα</b>        | ANALLANGVELR         | 620.85     | y <sub>7</sub>               | 758.42     | y <sub>6</sub> / y <sub>8</sub>                             | 687.38 / 871.50 | 60.7 / 85.3 / 96.3    | 29.0 / 26.7 / 31.0 |
| <b>Vaspin</b>      | VVDVSVPR             | 435.76     | y <sub>4</sub>               | 458.27     | y <sub>5</sub> / y <sub>6</sub>                             | 557.34 / 672.38 | 59.0 / 62.7 / 53.3    | 18.3 / 23.3 / 20.3 |
| <b>Visfatin</b>    | SYSFDEIR             | 508.74     | y <sub>6</sub>               | 766.37     | y <sub>5</sub> / b <sub>2</sub>                             | 679.34 / 251.10 | 95.0 / 86.3 / 68.3    | 20.7 / 21.3 / 20.0 |
| <b>Apo-A1</b>      | DYVSQFEGSALGK        | 700.84     | y <sub>10</sub>              | 1023.51    | y <sub>9</sub> / y <sub>11</sub>                            | 936.48 /        | 82.2                  | 34.1               |
| <b>Apo-A2</b>      | EQLTPLIK             | 471.29     | y <sub>4</sub>               | 470.33     | y <sub>5</sub> / y <sub>6</sub>                             | 571.38 / 684.47 | 65.5                  | 25.8               |
| <b>Apo-A4</b>      | LAPLAEDVR            | 492.28     | y <sub>5</sub>               | 589.29     | y <sub>6</sub> / y <sub>7</sub>                             | 702.38 / 799.43 | 67.0                  | 26.6               |
| <b>Apo-B</b>       | EVYGFNPEGK           | 570.27     | y <sub>7</sub>               | 748.36     | y <sub>5</sub> / y <sub>8</sub>                             | 544.27 / 911.43 | 72.7                  | 29.4               |
| <b>Apo-C1</b>      | EWFSETFQK            | 601.28     | y <sub>4</sub>               | 523.29     | y <sub>6</sub> / y <sub>7</sub>                             | 739.36 / 886.43 | 75.0                  | 30.5               |
| <b>Apo-C2</b>      | TYLPAVDEK            | 518.27     | y <sub>6</sub>               | 658.34     | y <sub>5</sub> / y <sub>7</sub>                             | 561.29 / 771.42 | 68.9                  | 27.5               |
| <b>Apo-C3</b>      | GWVTDGFSSLK          | 598.80     | y <sub>9</sub>               | 953.49     | y <sub>7</sub> / y <sub>8</sub>                             | 753.38 / 854.43 | 74.8                  | 30.4               |

| Protein              | Proteolytic peptide  | m/z    | Quantifier                   |         | Qualifier 1 and 2                                           |                 | DP / V                | CE / V             |
|----------------------|----------------------|--------|------------------------------|---------|-------------------------------------------------------------|-----------------|-----------------------|--------------------|
|                      |                      |        | Fragment ion                 | m/z     | Fragment ion                                                | m/z             |                       |                    |
| <b>Apo-C4</b>        | ELLETVVNR            | 532.80 | y <sub>5</sub>               | 588.35  | y <sub>6</sub> / y <sub>7</sub>                             | 717.39 / 830.47 | 70.2                  | 28.2               |
| <b>Apo-D</b>         | NILTSNNIDVK          | 615.84 | y <sub>7</sub>               | 789.41  | y <sub>8</sub> / y <sub>9</sub>                             | 890.46 /        | 76.0                  | 31.0               |
| <b>Apo-E</b>         | AATVGSLAGQPLQER      | 749.40 | y <sub>7</sub>               | 827.44  | y <sub>5</sub> / y <sub>8</sub>                             | 642.36 / 898.47 | 85.7                  | 35.8               |
| <b>Apo-A1</b>        | DYVSQFEGSALGK        | 700.84 | y <sub>10</sub>              | 1023.51 | y <sub>9</sub> / y <sub>11</sub>                            | 936.48 /        | 82.2                  | 34.1               |
| <b>S Adiponectin</b> | GDIGETGVPGAEGPR      | 709.35 | y <sub>9</sub>               | 845.45  | y <sub>7</sub> / b <sub>8</sub>                             | 683.35 / 735.36 | 125 / 106.3 / 125     | 34 / 34.3 / 27     |
| <b>S Adipsin</b>     | LYDVLR               | 392.73 | y <sub>4</sub>               | 508.31  | y <sub>5</sub> / b <sub>4</sub>                             | 671.38 / 249.14 | 73                    | 16.9               |
| <b>S Asprosin</b>    | EGISYLHFTK           | 402.22 | y <sub>7</sub> <sup>+2</sup> | 453.25  | y <sub>5</sub> <sup>+2</sup> / y <sub>6</sub> <sup>+2</sup> | 328.20 / 409.73 | 66.3 / 45.3 / 67.0    | 15.7 / 15.0 / 14.7 |
| <b>S Chemerin</b>    | GLQVALEEFHK          | 426.24 | b <sub>2</sub>               | 171.11  | y <sub>2</sub> <sup>+2</sup> / y <sub>9</sub> <sup>+2</sup> | 142.59 / 553.80 | 67.0 / 59.7 / 51.0    | 17.0 / 20.7 / 14.3 |
| <b>S DLK-1</b>       | LPSGYGLAYR           | 552.30 | y <sub>9</sub> <sup>+2</sup> | 495.76  | y <sub>5</sub> / y <sub>8</sub>                             | 586.34 / 893.46 | 118.0 / 89.3 / 78.7   | 26.3 / 31.7 / 30.7 |
| <b>S GLP-1</b>       | HAEGTFTSDVSSYLEGQAAK | 702.00 | y <sub>7</sub>               | 716.40  | y <sub>6</sub> / y <sub>10</sub>                            | 603.31 /        | 73                    | 29.7 / 26.7 / 29.7 |
| <b>S IL-6</b>        | EALAENLNLPK          | 666.87 | y <sub>2</sub>               | 244.17  | y <sub>8</sub> / y <sub>9</sub>                             | 941.51 /        | 114.0 / 79.7 / 127    | 30.7 / 31.0 / 30.3 |
| <b>S IL-10</b>       | DQLDNLLLK            | 539.81 | y <sub>7</sub>               | 835.54  | y <sub>5</sub> / y <sub>6</sub>                             | 600.41 / 715.43 | 100.7 / 95.7 / 70.7   | 23.0 / 28.3 / 23.0 |
| <b>S Leptin</b>      | DLLHVLAFSK           | 383.56 | y <sub>8</sub> <sup>+2</sup> | 460.78  | y <sub>4</sub> / y <sub>7</sub> <sup>+2</sup>               | 452.25 / 404.24 | 61.3 / 62.7 / 70.0    | 13.3 / 15.3 / 18.3 |
| <b>S PAI-1</b>       | FIINDWVK             | 520.79 | y <sub>6</sub>               | 780.43  | y <sub>5</sub> / b <sub>2</sub>                             | 667.34 / 261.16 | 112.0 / 104.0 / 98.3  | 21.0 / 22.7 / 20.7 |
| <b>S Progranulin</b> | GSEIVAGLEK           | 504.78 | y <sub>7</sub>               | 735.46  | y <sub>5</sub> / y <sub>6</sub>                             | 517.30 / 622.38 | 95.0 / 49.3 / 48.3    | 22.3 / 21.3 / 23   |
| <b>S RBP-4</b>       | YWGVASFLQK           | 602.82 | y <sub>6</sub>               | 693.39  | y <sub>8</sub> / b <sub>2</sub>                             | 855.50 / 350.15 | 83.0 / 79.0 / 91      | 26.3 / 27.0 / 27.0 |
| <b>S Resistin</b>    | IQEVAGSLIFR          | 619.86 | y <sub>7</sub>               | 763.45  | y <sub>6</sub> / y <sub>9</sub>                             | 692.41 / 997.57 | 106.3 / 96.7 / 112.30 | 30.7 / 29.7 / 28.3 |
| <b>S TNFa</b>        | ANALLANGVELR         | 623.86 | y <sub>7</sub>               | 764.43  | y <sub>6</sub> / y <sub>8</sub>                             | 693.39 / 877.51 | 60.7 / 85.3 / 96.3    | 29.0 / 26.7 / 31.0 |
| <b>S Vaspin</b>      | VVDVSVPR             | 438.76 | y <sub>4</sub>               | 458.27  | y <sub>5</sub> / y <sub>6</sub>                             | 563.35 / 678.38 | 59.0 / 62.7 / 53.3    | 18.3 / 23.3 / 20.3 |
| <b>S Visfatin</b>    | SYSFDEIR             | 512.25 | y <sub>6</sub>               | 773.39  | y <sub>5</sub> / b <sub>2</sub>                             | 686.36 / 251.10 | 95.0 / 86.3 / 68.3    | 20.7 / 21.3 / 20.0 |
| <b>S Apo-A1</b>      | DYVSQFEGSALGK        | 703.85 | y <sub>10</sub>              | 1023.51 | y <sub>9</sub> / y <sub>11</sub>                            | 936.48 /        | 82.2                  | 34.1               |
| <b>S Apo-A2</b>      | EQLTPLIK             | 474.8  | y <sub>4</sub>               | 470.33  | y <sub>5</sub> / y <sub>6</sub>                             | 571.38 /        | 65.5                  | 25.8               |
| <b>S Apo-A4</b>      | LAPLAEDVR            | 495.29 | y <sub>5</sub>               | 595.31  | y <sub>6</sub> / y <sub>7</sub>                             | 708.39 / 802.45 | 67.0                  | 26.6               |
| <b>S Apo-B</b>       | EVYGFNPEGK           | 573.28 | y <sub>7</sub>               | 748.36  | y <sub>5</sub> / y <sub>8</sub>                             | 544.27 / 911.43 | 72.7                  | 29.4               |
| <b>S Apo-C1</b>      | EWFSETFQK            | 606.29 | y <sub>4</sub>               | 533.31  | y <sub>6</sub> / y <sub>7</sub>                             | 749.39 / 896.46 | 75.0                  | 30.5               |
| <b>S Apo-C2</b>      | TYLPAVDEK            | 521.28 | y <sub>6</sub>               | 664.35  | y <sub>5</sub> / y <sub>7</sub>                             | 567.30 / 777.44 | 68.9                  | 27.5               |
| <b>S Apo-C3</b>      | GWVTDGFSSLK          | 601.81 | y <sub>9</sub>               | 959.51  | y <sub>7</sub> / y <sub>8</sub>                             | 753.38 / 854.43 | 74.8                  | 30.4               |
| <b>S Apo-C4</b>      | ELLETVVNR            | 539.81 | y <sub>5</sub>               | 594.36  | y <sub>6</sub> / y <sub>7</sub>                             | 723.40 / 836.49 | 70.2                  | 28.2               |
| <b>S Apo-D</b>       | NILTSNNIDVK          | 618.85 | y <sub>7</sub>               | 795.42  | y <sub>8</sub> / y <sub>9</sub>                             | 896.47 /        | 76.0                  | 31.0               |
| <b>S Apo-E</b>       | AATVGSLAGQPLQER      | 752.41 | y <sub>7</sub>               | 827.44  | y <sub>5</sub> / y <sub>8</sub>                             | 642.36 / 898.47 | 85.7                  | 35.8               |

**Table S2.** Calibration curve parameters, limits of detection (LOD) and lower limits of quantification (LLOQ) for the quantification of different adipokines and apolipoproteins in human serum.

| Protein            | external calibration curve |                       |                | LOD             |                 | LLOQ            |                 |
|--------------------|----------------------------|-----------------------|----------------|-----------------|-----------------|-----------------|-----------------|
|                    | slope                      | intercept             | R <sup>2</sup> | peptide (ng/mL) | protein (ng/mL) | peptide (ng/mL) | protein (ng/mL) |
| <b>Adipsin</b>     | 3.11·10 <sup>4</sup>       | 1.41·10 <sup>6</sup>  | 0.97           | 0.63            | 21.63           | 1.88            | 64.88           |
| <b>Adiponectin</b> | 3.22·10 <sup>4</sup>       | -7.72·10 <sup>4</sup> | 0.99           | 0.71            | 13.21           | 2.13            | 39.62           |
| <b>Asprosin</b>    | 2.11·10 <sup>4</sup>       | -4.50·10 <sup>6</sup> | 0.96           | 6.02            | 85.00           | 18.05           | 255.00          |
| <b>Chemerin</b>    | 9.71·10 <sup>4</sup>       | -5.97·10 <sup>5</sup> | 0.99           | 1.91            | 27.93           | 5.74            | 83.78           |
| <b>DLK-1</b>       | 6.30·10 <sup>4</sup>       | -6.30·10 <sup>5</sup> | 0.99           | 6.62            | 247.80          | 19.85           | 743.40          |
| <b>GLP-1</b>       | 3.35·10 <sup>3</sup>       | -1.49·10 <sup>6</sup> | 0.98           | 105.21          | 208.35          | 315.63          | 625.05          |
| <b>IL-6</b>        | 1.36·10 <sup>4</sup>       | -1.54·10 <sup>5</sup> | 0.99           | 5.33            | 94.87           | 15.98           | 284.62          |
| <b>IL-10</b>       | 4.20·10 <sup>4</sup>       | -1.46·10 <sup>6</sup> | 0.98           | 10.78           | 205.17          | 32.33           | 615.51          |
| <b>Leptin</b>      | 9.71·10 <sup>4</sup>       | -5.97·10 <sup>5</sup> | 0.99           | 2.30            | 37.28           | 6.89            | 111.85          |
| <b>PAI-1</b>       | 3.78·10 <sup>5</sup>       | -1.29·10 <sup>6</sup> | 0.99           | 0.34            | 22.53           | 1.03            | 67.59           |
| <b>Progranulin</b> | 7.53·10 <sup>4</sup>       | 2.08·10 <sup>5</sup>  | 0.99           | 0.50            | 31.77           | 1.51            | 95.32           |
| <b>RBP-4</b>       | 1.27·10 <sup>5</sup>       | -2.54·10 <sup>6</sup> | 0.99           | 30.09           | 575.25          | 90.27           | 1725.75         |
| <b>Resistin</b>    | 9.25·10 <sup>3</sup>       | -2.56·10 <sup>5</sup> | 0.97           | 12.38           | 114.19          | 37.13           | 342.57          |
| <b>TNFα</b>        | 1.23·10 <sup>5</sup>       | -3.13·10 <sup>6</sup> | 0.99           | 31.14           | 616.10          | 93.43           | 1848.30         |
| <b>Vaspin</b>      | 1.20·10 <sup>5</sup>       | -9.41·10 <sup>4</sup> | 0.99           | 0.44            | 23.59           | 1.31            | 70.76           |
| <b>Visfatin</b>    | 1.53·10 <sup>5</sup>       | 5.94·10 <sup>5</sup>  | 0.99           | 0.51            | 27.76           | 1.53            | 83.28           |
| <b>Apo-A1</b>      | 7.32·10 <sup>3</sup>       | -6.99·10 <sup>5</sup> | 0.98           | 46.86           | 1025.93         | 140.57          | 3077.80         |
| <b>Apo-A2</b>      | 5.08·10 <sup>4</sup>       | 3.12·10 <sup>5</sup>  | 0.99           | 1.58            | 18.63           | 4.74            | 55.88           |
| <b>Apo-A4</b>      | 1.97·10 <sup>4</sup>       | 3.55·10 <sup>4</sup>  | 0.99           | 1.65            | 75.67           | 4.94            | 227.00          |
| <b>Apo-B</b>       | 1.62·10 <sup>4</sup>       | 8.44·10 <sup>3</sup>  | 0.99           | 1.91            | 859.34          | 5.72            | 2578.03         |
| <b>Apo-C1</b>      | 2.69·10 <sup>3</sup>       | -4.43·10 <sup>4</sup> | 0.99           | 4.04            | 31.11           | 12.11           | 93.32           |
| <b>Apo-C2</b>      | 6.02·10 <sup>4</sup>       | 5.98·10 <sup>5</sup>  | 0.99           | 1.73            | 18.81           | 5.20            | 56.42           |
| <b>Apo-C3</b>      | 5.00·10 <sup>3</sup>       | -1.19·10 <sup>5</sup> | 0.99           | 20.03           | 180.87          | 60.08           | 542.60          |
| <b>Apo-C4</b>      | 3.65·10 <sup>4</sup>       | -7.26·10 <sup>4</sup> | 0.99           | 1.80            | 24.26           | 5.39            | 72.77           |
| <b>Apo-D</b>       | 4.03·10 <sup>4</sup>       | 2.40·10 <sup>5</sup>  | 0.99           | 2.06            | 35.46           | 6.18            | 106.38          |
| <b>Apo-E</b>       | 1.30·10 <sup>4</sup>       | -1.47·10 <sup>5</sup> | 0.99           | 5.01            | 120.51          | 15.03           | 361.54          |

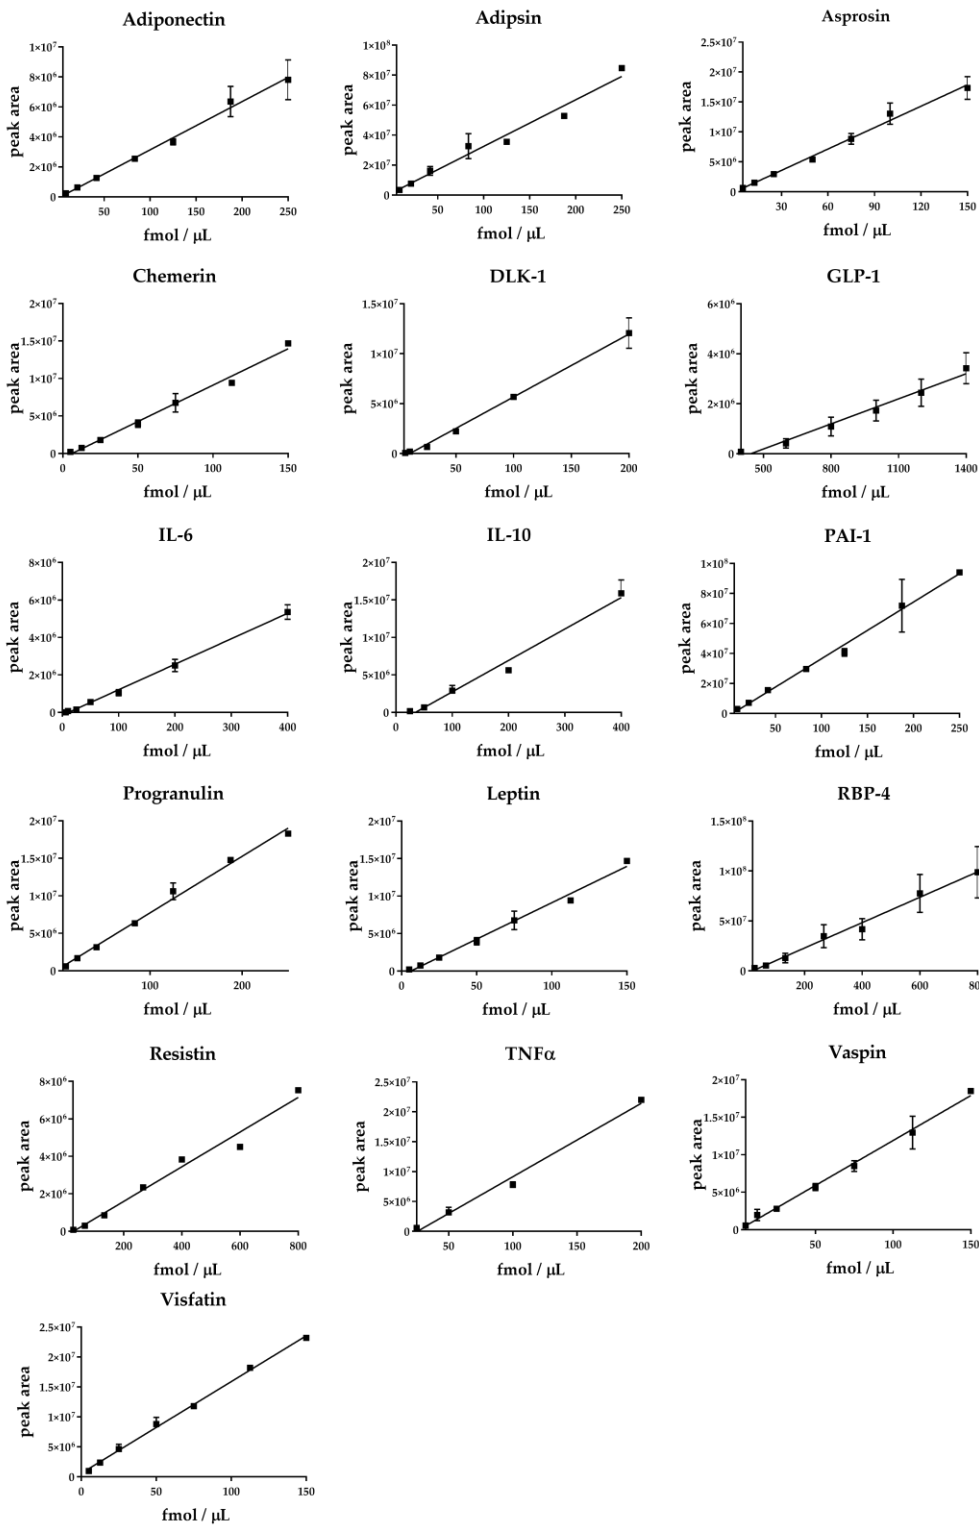

**Figure S1.** Calibration curves (n=5) of 16 adipokines. Isotope-labeled peptides were spiked in to HSA/IgG-depleted human serum and serially diluted.

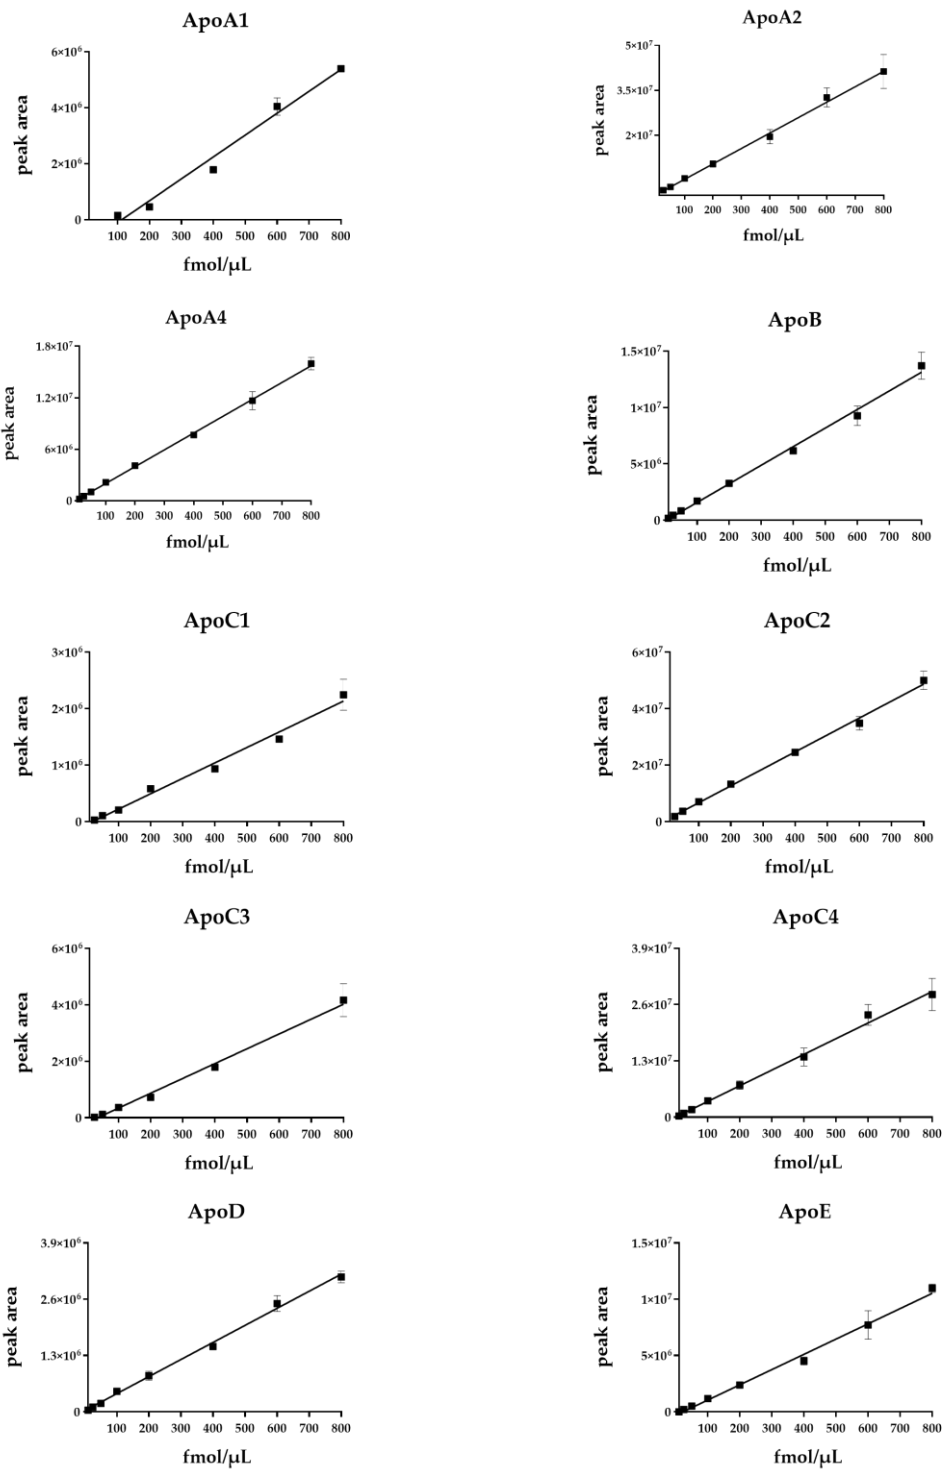

**Figure S2.** Calibration curves (n=5) of 10 apolipoprotein. Isotope-labeled peptides were spiked into HSA/IgG-depleted human serum and serially diluted.
